# Supplementary material
Source: Springer Nature journal article supplement (https://www.springermedizin.de/resource/supplementary/12889_2012_5357_MOESM2_ESM.pdf/9495044)
Supplement: MOESM2 [file 9495044]

| Diagnosis                 | No sign and/or symptoms <sup>‡</sup> | Number with infection | Number without infection | Number needed to screen to detect one woman with infection | 95% CI <sup>#</sup> |
|---------------------------|--------------------------------------|-----------------------|--------------------------|------------------------------------------------------------|---------------------|
| <b>Pregnant women</b>     |                                      |                       |                          |                                                            |                     |
| Chlamydia                 | All ages                             | 5                     | 35                       | 8                                                          | 4, 24               |
|                           | ≤25 yrs                              | 2                     | 13                       | 8                                                          | 3, 61               |
|                           | >25 yrs                              | 3                     | 22                       | 9                                                          | 4, 40               |
| Gonorrhea                 | All ages                             | 0                     | 40                       | ∞                                                          | 12, ∞               |
|                           | ≤25 yrs                              | 0                     | 15                       | ∞                                                          | 5, ∞                |
|                           | >25 yrs                              | 0                     | 25                       | ∞                                                          | 8, ∞                |
| Chlamydia or gonorrhea    | All ages                             | 5                     | 35                       | 8                                                          | 4, 24               |
|                           | ≤25 yrs                              | 2                     | 13                       | 8                                                          | 3, 61               |
|                           | >25 yrs                              | 3                     | 22                       | 9                                                          | 4, 40               |
| <b>Non pregnant women</b> |                                      |                       |                          |                                                            |                     |
| Chlamydia                 | All ages                             | 26                    | 589                      | 24                                                         | 17, 36              |
|                           | ≤ 25 yrs                             | 3                     | 63                       | 23                                                         | 8, 106              |
|                           | > 25 yrs                             | 23                    | 524                      | 24                                                         | 17, 38              |
| Gonorrhea                 | All ages                             | 9                     | 606                      | 69                                                         | 37, 149             |
|                           | ≤ 25 yrs                             | 3                     | 63                       | 23                                                         | 8, 106              |
|                           | > 25 yrs                             | 6                     | 541                      | 92                                                         | 43, 248             |
| Chlamydia or gonorrhea    | All ages                             | 33                    | 582                      | 19                                                         | 14, 27              |
|                           | ≤ 25 yrs                             | 6                     | 60                       | 11                                                         | 6, 30               |
|                           | > 25 yrs                             | 27                    | 520                      | 21                                                         | 15, 31              |

<sup>‡</sup> Any of symptomatic vaginal discharge, urethral discharge, or lower abdominal pain or cervix examination (inflammation /pus/swab pus/blood or other) or vaginal discharge examination (white /yellow/green/other) or cervical motion tenderness during bimanual examination.

∞: infinity.

<sup>#</sup> 95% exact binomial confidence interval.
